# Supplementary material
Source: Research Square preprint supplement (doi:10.21203/rs.3.rs-9948269/v1)
Supplement: Supplementary file 1 [file 2d32d13a39aa2eee17216009.xlsx]

## Sheet: README
Symbiosis Practice Insight – audience evaluation
ARTIS Planetarium, 18 May 2026 (iteration 5)
File contents
Paired_53	All 53 paired respondents (pre+post), with raw Dutch labels and numeric Likert scores 1–5.
All_post_65	Full post-survey sample (N = 65), used for post-only descriptives that the manuscript reports on the full post sample.
All_pre_90	Full pre-survey sample with a valid code/IP (N = 90), used for the fibre baseline reported in §3.5.
Familiarity_W	Paired Wilcoxon signed-rank analysis for familiarity. Difference, sign, mid-rank, W+, W–, W = min(W+,W–), and normal-approximation p-value all computed inline so they can be checked cell by cell.
Importance_W	Same for agreement that microbial diversity matters.
Memorable_chi2	Chi-square goodness-of-fit against a uniform distribution for the most-memorable-act item.
Post_only	Descriptives for Requiem emotional impact, Feed Your Microbes intention, and fibre-health insight, computed on the full post-survey sample.
Fibre_baseline	Distribution of the four-category fibre intake item from the pre-survey, with the proportion below the Dutch Health Council recommendation.
Words	Frequency table of the one-word takeaway responses.
Likert codings
Familiarity (Q2): 1 helemaal niet · 2 beetje · 3 redelijk · 4 goed · 5 zeer vertrouwd
Agreement / insight (Q3, Q7): 1 helemaal mee oneens · 2 mee oneens · 3 neutraal · 4 mee eens · 5 helemaal mee eens
Requiem emotional impact (Q4 post): 1 helemaal niet · 2 een beetje · 3 matig · 4 sterk · 5 zeer sterk
FYM intention (Q6 post): 1 zeer onwaarschijnlijk · 2 onwaarschijnlijk · 3 misschien · 4 waarschijnlijk · 5 zeer waarschijnlijk
Fibre intake (Q4 pre): 1 <5 g (0–1 portion) · 2 6–12 g (2–3) · 3 12–20 g (4–5) · 4 ≥20 g (≥6 portions)

## Sheet: Paired_53
pair_id	fam_pre_raw	fam_pre	fam_post_raw	fam_post	imp_pre_raw	imp_pre	imp_post_raw	imp_post	fib_pre_raw	fib_pre	emo_post_raw	emo_post	memorable_act	intent_raw	intent	insight_raw	insight	word_takeaway
P01	redelijk vertrouwd	3	redelijk vertrouwd	3	helemaal mee eens	5	helemaal mee eens	5	4 tot 5 porties (ongeveer 12 tot 20 gram)	3	een beetje	2	rewilding en feed your microbes	misschien	3	mee eens	4	Onverminderde nieuwsgierigheid
P02	goed vertrouwd	4	goed vertrouwd	4	helemaal mee eens	5	helemaal mee eens	5	6 porties of meer (20 gram of meer)	4	helemaal niet	1	rewilding en feed your microbes	misschien	3	neutral	3	Ons microbioom lijkt ideaal gesproken op ons sterrenstelsel!
P03	redelijk vertrouwd	3	goed vertrouwd	4	helemaal mee eens	5	helemaal mee eens	5	4 tot 5 porties (ongeveer 12 tot 20 gram)	3	matig	3	de mens als holobiont	waarschijnlijk	4	mee eens	4	Holobiont
P04	beetje vertrouwd	2	beetje vertrouwd	2	mee eens	4	helemaal mee eens	5	6 porties of meer (20 gram of meer)	4	een beetje	2	rewilding en feed your microbes	misschien	3	neutral	3	Indrukwekkend
P05	redelijk vertrouwd	3	beetje vertrouwd	2	helemaal mee eens	5	helemaal mee eens	5	4 tot 5 porties (ongeveer 12 tot 20 gram)	3	helemaal niet	1	rewilding en feed your microbes	zeer waarschijnlijk	5	mee eens	4	Vezels
P06	beetje vertrouwd	2	redelijk vertrouwd	3	mee eens	4	helemaal mee eens	5	4 tot 5 porties (ongeveer 12 tot 20 gram)	3	een beetje	2	symbiose	waarschijnlijk	4	mee eens	4	Enorme importantie van microben in onze darmen.
P07	beetje vertrouwd	2	beetje vertrouwd	2	helemaal mee eens	5	helemaal mee eens	5	2 tot 3 porties (ongeveer 6 tot 12 gram)	2	sterk	4	symbiose	onwwaarschijnlijk	2	mee eens	4	Vezelrijk
P08	beetje vertrouwd	2	goed vertrouwd	4	mee eens	4	helemaal mee eens	5	2 tot 3 porties (ongeveer 6 tot 12 gram)	2	een beetje	2	rewilding en feed your microbes	misschien	3	helemaal mee eens	5	Prima, ga zo door !
P09	beetje vertrouwd	2	goed vertrouwd	4	helemaal mee eens	5	helemaal mee eens	5	4 tot 5 porties (ongeveer 12 tot 20 gram)	3	sterk	4	het verbroken pact en requiem voor een microbe	zeer waarschijnlijk	5	helemaal mee eens	5	Ik doe graag mee aan het onderzoek "
P10	beetje vertrouwd	2	redelijk vertrouwd	3	helemaal mee oneens	1	helemaal mee oneens	1	2 tot 3 porties (ongeveer 6 tot 12 gram)	2	helemaal niet	1	het verbroken pact en requiem voor een microbe	zeer waarschijnlijk	5	helemaal mee oneens	1	Dat ons hedendaags dieet destructief is voor gezonde darmmicroben
P11	goed vertrouwd	4	goed vertrouwd	4	helemaal mee eens	5	helemaal mee eens	5	2 tot 3 porties (ongeveer 6 tot 12 gram)	2	een beetje	2	het verbroken pact en requiem voor een microbe	zeer waarschijnlijk	5	helemaal mee eens	5	Microben zijn belangrijk voor je gezondheid
P12	beetje vertrouwd	2	beetje vertrouwd	2	mee eens	4	helemaal mee eens	5	2 tot 3 porties (ongeveer 6 tot 12 gram)	2	helemaal niet	1	het verbroken pact en requiem voor een microbe	zeer waarschijnlijk	5	helemaal mee eens	5	Nieuwsgierigheid welke bacteri��n ik heb en welke ik mis.
P13	beetje vertrouwd	2	beetje vertrouwd	2	helemaal mee eens	5	helemaal mee eens	5	6 porties of meer (20 gram of meer)	4	helemaal niet	1	rewilding en feed your microbes	misschien	3	helemaal mee eens	5	Jas
P14	goed vertrouwd	4	goed vertrouwd	4	helemaal mee eens	5	helemaal mee eens	5	4 tot 5 porties (ongeveer 12 tot 20 gram)	3	helemaal niet	1	de mens als holobiont	misschien	3	mee eens	4
P15	redelijk vertrouwd	3	redelijk vertrouwd	3	helemaal mee eens	5	mee eens	4	2 tot 3 porties (ongeveer 6 tot 12 gram)	2	matig	3	het verbroken pact en requiem voor een microbe	misschien	3	helemaal mee eens	5	Bacteri��n / microben worden onterecht als vies gezien. Ze zijn veel te nuttig!
P16	beetje vertrouwd	2	redelijk vertrouwd	3	helemaal mee eens	5	helemaal mee eens	5	4 tot 5 porties (ongeveer 12 tot 20 gram)	3	helemaal niet	1	rewilding en feed your microbes	misschien	3	helemaal mee eens	5	Inspired
P17	beetje vertrouwd	2	goed vertrouwd	4	mee eens	4	helemaal mee eens	5	4 tot 5 porties (ongeveer 12 tot 20 gram)	3	een beetje	2	rewilding en feed your microbes	zeer waarschijnlijk	5	helemaal mee eens	5
P18	helemaal niet vertrouwd	1	beetje vertrouwd	2	helemaal mee eens	5	mee eens	4	2 tot 3 porties (ongeveer 6 tot 12 gram)	2	een beetje	2	het ontstaan van het leven	waarschijnlijk	4	mee oneens	2	Interessant
P19	beetje vertrouwd	2	beetje vertrouwd	2	helemaal mee eens	5	helemaal mee eens	5	4 tot 5 porties (ongeveer 12 tot 20 gram)	3	matig	3	rewilding en feed your microbes	waarschijnlijk	4	helemaal mee eens	5	Voed je microben en zij voeden jou met een betere gezindheid
P20	redelijk vertrouwd	3	redelijk vertrouwd	3	helemaal mee eens	5	helemaal mee eens	5	2 tot 3 porties (ongeveer 6 tot 12 gram)	2	matig	3		zeer waarschijnlijk	5	mee eens	4	Besef
P21	beetje vertrouwd	2	beetje vertrouwd	2	mee eens	4	mee eens	4	4 tot 5 porties (ongeveer 12 tot 20 gram)	3	een beetje	2	het ontstaan van het leven	misschien	3	mee eens	4
P22	beetje vertrouwd	2	redelijk vertrouwd	3	helemaal mee eens	5	mee eens	4	2 tot 3 porties (ongeveer 6 tot 12 gram)	2	matig	3	het verbroken pact en requiem voor een microbe	misschien	3	mee eens	4	Interessant
P23	helemaal niet vertrouwd	1	beetje vertrouwd	2	helemaal mee eens	5	helemaal mee eens	5	4 tot 5 porties (ongeveer 12 tot 20 gram)	3	helemaal niet	1	rewilding en feed your microbes	waarschijnlijk	4	helemaal mee eens	5	Goed over eten nadenken.
P24	redelijk vertrouwd	3	redelijk vertrouwd	3	helemaal mee eens	5	helemaal mee eens	5	2 tot 3 porties (ongeveer 6 tot 12 gram)	2	een beetje	2	het ontstaan van het leven	waarschijnlijk	4	mee eens	4	Indrukwekkend
P25	beetje vertrouwd	2	goed vertrouwd	4	helemaal mee eens	5	helemaal mee eens	5	2 tot 3 porties (ongeveer 6 tot 12 gram)	2	sterk	4	rewilding en feed your microbes	misschien	3	helemaal mee eens	5	Hoe fragiel het evenwicht in de darm is.
P26	helemaal niet vertrouwd	1	beetje vertrouwd	2	mee eens	4	mee eens	4	4 tot 5 porties (ongeveer 12 tot 20 gram)	3	helemaal niet	1	rewilding en feed your microbes	zeer waarschijnlijk	5	neutral	3	Meer vragen, dan antwoorden.
P27	redelijk vertrouwd	3	zeer vertrouwd	5	helemaal mee eens	5	helemaal mee eens	5	2 tot 3 porties (ongeveer 6 tot 12 gram)	2	sterk	4	het verbroken pact en requiem voor een microbe	waarschijnlijk	4	mee eens	4	Biodiversiteit
P28	redelijk vertrouwd	3	goed vertrouwd	4	mee eens	4	helemaal mee eens	5	2 tot 3 porties (ongeveer 6 tot 12 gram)	2	sterk	4	het verbroken pact en requiem voor een microbe	zeer onwaarschijnlijk	1	helemaal mee oneens	1	Mijn darmen nog beter voeden en mijn kinderen inspireren om ook hun darmen te voeden en hierdoor andere keuzes te maken.
P29	zeer vertrouwd	5	zeer vertrouwd	5	helemaal mee eens	5	helemaal mee eens	5	6 porties of meer (20 gram of meer)	4	zeer sterk	5	symbiose	zeer waarschijnlijk	5	neutral	3	Fantastisch!
P30	beetje vertrouwd	2	redelijk vertrouwd	3	helemaal mee oneens	1	helemaal mee oneens	1	4 tot 5 porties (ongeveer 12 tot 20 gram)	3	matig	3	het ontstaan van het leven	zeer waarschijnlijk	5	helemaal mee oneens	1
P31	goed vertrouwd	4	goed vertrouwd	4	helemaal mee eens	5	helemaal mee eens	5	2 tot 3 porties (ongeveer 6 tot 12 gram)	2	een beetje	2	rewilding en feed your microbes	misschien	3	helemaal mee eens	5	Vezels
P32	beetje vertrouwd	2	redelijk vertrouwd	3	helemaal mee eens	5	helemaal mee eens	5	4 tot 5 porties (ongeveer 12 tot 20 gram)	3	een beetje	2	rewilding en feed your microbes	waarschijnlijk	4	helemaal mee eens	5	Interessant
P33	helemaal niet vertrouwd	1	beetje vertrouwd	2	mee eens	4	helemaal mee eens	5	2 tot 3 porties (ongeveer 6 tot 12 gram)	2	een beetje	2	het verbroken pact en requiem voor een microbe	waarschijnlijk	4	mee eens	4	Interessant!
P34	helemaal niet vertrouwd	1	beetje vertrouwd	2	mee eens	4	helemaal mee eens	5	6 porties of meer (20 gram of meer)	4	matig	3	het verbroken pact en requiem voor een microbe	misschien	3	helemaal mee eens	5
P35	helemaal niet vertrouwd	1	helemaal niet vertrouwd	1	neutraal	3	mee eens	4	4 tot 5 porties (ongeveer 12 tot 20 gram)	3	sterk	4	rewilding en feed your microbes	misschien	3	mee eens	4	Fascinerend
P36	redelijk vertrouwd	3	redelijk vertrouwd	3	mee eens	4	helemaal mee eens	5	6 porties of meer (20 gram of meer)	4	sterk	4				mee eens	4	Gezond eten blijft absolute noodzaak
P37	zeer vertrouwd	5	zeer vertrouwd	5	helemaal mee eens	5	helemaal mee eens	5	6 porties of meer (20 gram of meer)	4	sterk	4	het verbroken pact en requiem voor een microbe	waarschijnlijk	4	helemaal mee eens	5	Zorg voor je microben in je darm!!!
P38	helemaal niet vertrouwd	1	beetje vertrouwd	2	helemaal mee eens	5	helemaal mee eens	5	4 tot 5 porties (ongeveer 12 tot 20 gram)	3	een beetje	2	symbiose	zeer waarschijnlijk	5	helemaal mee eens	5	Nog meer plantaardig eten en zo min mogelijk bewerkt voedsel
P39	goed vertrouwd	4	zeer vertrouwd	5	helemaal mee eens	5	helemaal mee eens	5	2 tot 3 porties (ongeveer 6 tot 12 gram)	2	sterk	4	het verbroken pact en requiem voor een microbe	waarschijnlijk	4	mee eens	4	Mooi
P40	goed vertrouwd	4	zeer vertrouwd	5	helemaal mee eens	5	helemaal mee eens	5	6 porties of meer (20 gram of meer)	4	matig	3	rewilding en feed your microbes	waarschijnlijk	4	helemaal mee eens	5	Aan de slag
P41	helemaal niet vertrouwd	1	beetje vertrouwd	2	helemaal mee eens	5	helemaal mee eens	5	2 tot 3 porties (ongeveer 6 tot 12 gram)	2	sterk	4	het verbroken pact en requiem voor een microbe	waarschijnlijk	4	helemaal mee eens	5	Gezond eten
P42	beetje vertrouwd	2	redelijk vertrouwd	3	helemaal mee eens	5	helemaal mee eens	5	4 tot 5 porties (ongeveer 12 tot 20 gram)	3	matig	3	het verbroken pact en requiem voor een microbe	zeer onwaarschijnlijk	1	helemaal mee eens	5	Inspirerend
P43	beetje vertrouwd	2	goed vertrouwd	4	helemaal mee eens	5	helemaal mee eens	5	4 tot 5 porties (ongeveer 12 tot 20 gram)	3	sterk	4	rewilding en feed your microbes	misschien	3	helemaal mee eens	5	Belangrijk
P44	helemaal niet vertrouwd	1	beetje vertrouwd	2	mee eens	4	helemaal mee eens	5	2 tot 3 porties (ongeveer 6 tot 12 gram)	2	een beetje	2	het ontstaan van het leven	misschien	3	helemaal mee eens	5	Vezels
P45	beetje vertrouwd	2	goed vertrouwd	4	helemaal mee eens	5	helemaal mee eens	5	4 tot 5 porties (ongeveer 12 tot 20 gram)	3	sterk	4	rewilding en feed your microbes	waarschijnlijk	4	helemaal mee eens	5	Wisselwerking tussen hersenen en darmen
P46	beetje vertrouwd	2	beetje vertrouwd	2	mee eens	4	helemaal mee eens	5	6 porties of meer (20 gram of meer)	4	sterk	4	rewilding en feed your microbes	onwwaarschijnlijk	2	helemaal mee eens	5	Oerbacterie.
P47	redelijk vertrouwd	3	redelijk vertrouwd	3	helemaal mee eens	5	helemaal mee eens	5	4 tot 5 porties (ongeveer 12 tot 20 gram)	3	een beetje	2	rewilding en feed your microbes	waarschijnlijk	4	mee eens	4	Nieuwsgierigheid
P48	redelijk vertrouwd	3	redelijk vertrouwd	3	helemaal mee eens	5	helemaal mee eens	5	6 porties of meer (20 gram of meer)	4	matig	3	symbiose	waarschijnlijk	4	helemaal mee eens	5	Hoop
P49	helemaal niet vertrouwd	1	goed vertrouwd	4	helemaal mee eens	5	helemaal mee eens	5	4 tot 5 porties (ongeveer 12 tot 20 gram)	3	sterk	4	rewilding en feed your microbes	waarschijnlijk	4	helemaal mee eens	5	Nog meer vezels eten
P50	beetje vertrouwd	2	goed vertrouwd	4	mee eens	4	helemaal mee eens	5	6 porties of meer (20 gram of meer)	4	een beetje	2	het verbroken pact en requiem voor een microbe	misschien	3	helemaal mee eens	5	Bijzonder
P51	beetje vertrouwd	2	goed vertrouwd	4	helemaal mee eens	5	helemaal mee eens	5	2 tot 3 porties (ongeveer 6 tot 12 gram)	2	sterk	4	rewilding en feed your microbes	zeer waarschijnlijk	5	helemaal mee eens	5	Aandacht
P52	redelijk vertrouwd	3	goed vertrouwd	4	helemaal mee eens	5	helemaal mee eens	5	2 tot 3 porties (ongeveer 6 tot 12 gram)	2	sterk	4	rewilding en feed your microbes	waarschijnlijk	4	mee eens	4	Het grote belang van juiste voeding v d darmmicroben en de eigen invloed verantwoordelijkheid daarin
P53	beetje vertrouwd	2	redelijk vertrouwd	3	mee eens	4	mee eens	4	2 tot 3 porties (ongeveer 6 tot 12 gram)	2	zeer sterk	5		zeer waarschijnlijk	5	mee eens	4	Muziek is goed voor de darmen

## Sheet: All_post_65
row	fam_raw	fam	imp_raw	imp	emo_raw	emo	memorable_act	intent_raw	intent	insight_raw	insight	word
1	redelijk vertrouwd	3	helemaal mee oneens	1	matig	3	het ontstaan van het leven	zeer waarschijnlijk	5	helemaal mee oneens	1
2	zeer vertrouwd	5	helemaal mee eens	5	sterk	4	het verbroken pact en requiem voor een microbe	waarschijnlijk	4	mee eens	4	Mooi
3	goed vertrouwd	4	helemaal mee eens	5	een beetje	2	rewilding en feed your microbes	zeer waarschijnlijk	5	helemaal mee eens	5
4	goed vertrouwd	4	helemaal mee eens	5	sterk	4	de mens als holobiont	misschien	3	mee eens	4
5	beetje vertrouwd	2	helemaal mee eens	5	een beetje	2	het verbroken pact en requiem voor een microbe	waarschijnlijk	4	mee eens	4	Interessant!
6	beetje vertrouwd	2	helemaal mee eens	5	matig	3	rewilding en feed your microbes	waarschijnlijk	4	helemaal mee eens	5	Voed je microben en zij voeden jou met een betere gezindheid
7	goed vertrouwd	4	helemaal mee eens	5	een beetje	2	rewilding en feed your microbes	misschien	3	helemaal mee eens	5	Prima, ga zo door !
8	beetje vertrouwd	2	mee eens	4	een beetje	2	het ontstaan van het leven	misschien	3	mee eens	4
9	redelijk vertrouwd	3	helemaal mee eens	5	matig	3		zeer waarschijnlijk	5	mee eens	4	Besef
10	goed vertrouwd	4	helemaal mee eens	5	helemaal niet	1	de mens als holobiont	misschien	3	mee eens	4
11	zeer vertrouwd	5	helemaal mee eens	5	sterk	4	het verbroken pact en requiem voor een microbe	waarschijnlijk	4	helemaal mee eens	5	Zorg voor je microben in je darm!!!
12	goed vertrouwd	4	helemaal mee eens	5	sterk	4	het verbroken pact en requiem voor een microbe	zeer waarschijnlijk	5	helemaal mee eens	5	Ik doe graag mee aan het onderzoek "
13	beetje vertrouwd	2	helemaal mee eens	5	helemaal niet	1	rewilding en feed your microbes	waarschijnlijk	4	helemaal mee eens	5	Goed over eten nadenken.
14	redelijk vertrouwd	3	helemaal mee eens	5	matig	3	het verbroken pact en requiem voor een microbe	zeer onwaarschijnlijk	1	helemaal mee eens	5	Inspirerend
15	beetje vertrouwd	2	helemaal mee eens	5	een beetje	2	symbiose	zeer waarschijnlijk	5	helemaal mee eens	5	Nog meer plantaardig eten en zo min mogelijk bewerkt voedsel
16	redelijk vertrouwd	3	helemaal mee eens	5	een beetje	2	rewilding en feed your microbes	waarschijnlijk	4	mee eens	4	Nieuwsgierigheid
17	redelijk vertrouwd	3	helemaal mee eens	5	een beetje	2	symbiose	waarschijnlijk	4	mee eens	4	Enorme importantie van microben in onze darmen.
18	beetje vertrouwd	2	mee eens	4	helemaal niet	1	rewilding en feed your microbes	zeer waarschijnlijk	5	neutral	3	Meer vragen, dan antwoorden.
19	redelijk vertrouwd	3	helemaal mee eens	5	een beetje	2	rewilding en feed your microbes	misschien	3	mee eens	4	Onverminderde nieuwsgierigheid
20	redelijk vertrouwd	3	mee eens	4	matig	3	het verbroken pact en requiem voor een microbe	misschien	3	helemaal mee eens	5	Bacteri��n / microben worden onterecht als vies gezien. Ze zijn veel te nuttig!
21	goed vertrouwd	4	helemaal mee eens	5	sterk	4	rewilding en feed your microbes	misschien	3	helemaal mee eens	5	Hoe fragiel het evenwicht in de darm is.
22	goed vertrouwd	4	helemaal mee eens	5	matig	3	de mens als holobiont	waarschijnlijk	4	mee eens	4	Holobiont
23	zeer vertrouwd	5	helemaal mee eens	5	matig	3	rewilding en feed your microbes	waarschijnlijk	4	helemaal mee eens	5	Aan de slag
24	beetje vertrouwd	2	helemaal mee eens	5	helemaal niet	1	het verbroken pact en requiem voor een microbe	zeer waarschijnlijk	5	helemaal mee eens	5	Nieuwsgierigheid welke bacteri��n ik heb en welke ik mis.
25	goed vertrouwd	4	helemaal mee eens	5	sterk	4	rewilding en feed your microbes	zeer waarschijnlijk	5	helemaal mee eens	5	Aandacht
26	redelijk vertrouwd	3	mee eens	4	matig	3	het verbroken pact en requiem voor een microbe	misschien	3	mee eens	4	Interessant
27	goed vertrouwd	4	helemaal mee eens	5	sterk	4	rewilding en feed your microbes	misschien	3	helemaal mee eens	5	Belangrijk
28	goed vertrouwd	4	helemaal mee eens	5	sterk	4	rewilding en feed your microbes	waarschijnlijk	4	helemaal mee eens	5	Nog meer vezels eten
29	redelijk vertrouwd	3	helemaal mee eens	5	helemaal niet	1	rewilding en feed your microbes	misschien	3	helemaal mee eens	5	Inspired
30	beetje vertrouwd	2	helemaal mee eens	5	sterk	4	het verbroken pact en requiem voor een microbe	waarschijnlijk	4	helemaal mee eens	5	Gezond eten
31	zeer vertrouwd	5	helemaal mee eens	5	sterk	4	het verbroken pact en requiem voor een microbe	waarschijnlijk	4	mee eens	4	Biodiversiteit
32	goed vertrouwd	4	helemaal mee eens	5	een beetje	2	rewilding en feed your microbes	misschien	3	helemaal mee eens	5	Vezels
33	beetje vertrouwd	2	helemaal mee eens	5	sterk	4	symbiose	onwwaarschijnlijk	2	mee eens	4	Vezelrijk
34	goed vertrouwd	4	helemaal mee eens	5	een beetje	2	het verbroken pact en requiem voor een microbe	misschien	3	helemaal mee eens	5	Bijzonder
35	beetje vertrouwd	2	helemaal mee eens	5	sterk	4	rewilding en feed your microbes	onwwaarschijnlijk	2	helemaal mee eens	5	Oerbacterie.
36	beetje vertrouwd	2	helemaal mee eens	5	een beetje	2	het ontstaan van het leven	misschien	3	helemaal mee eens	5	Vezels
37	goed vertrouwd	4	helemaal mee eens	5	een beetje	2	symbiose	waarschijnlijk	4	helemaal mee eens	5	vezelrijke voeding
38	beetje vertrouwd	2	helemaal mee eens	5	matig	3	het verbroken pact en requiem voor een microbe	misschien	3	helemaal mee eens	5
39	goed vertrouwd	4	helemaal mee eens	5	helemaal niet	1	rewilding en feed your microbes	misschien	3	neutral	3	Ons microbioom lijkt ideaal gesproken op ons sterrenstelsel!
40	redelijk vertrouwd	3	helemaal mee eens	5	matig	3	symbiose	waarschijnlijk	4	helemaal mee eens	5	Hoop
41	beetje vertrouwd	2	helemaal mee eens	5	helemaal niet	1	rewilding en feed your microbes	misschien	3	helemaal mee eens	5	Jas
42	redelijk vertrouwd	3	helemaal mee eens	5	een beetje	2	rewilding en feed your microbes	waarschijnlijk	4	helemaal mee eens	5	Interessant
43	helemaal niet vertrouwd	1	mee eens	4	sterk	4	rewilding en feed your microbes	misschien	3	mee eens	4	Fascinerend
44	goed vertrouwd	4	helemaal mee eens	5	sterk	4	het verbroken pact en requiem voor een microbe	zeer onwaarschijnlijk	1	helemaal mee oneens	1	Mijn darmen nog beter voeden en mijn kinderen inspireren om ook hun darmen te voeden en hierdoor andere keuzes te maken.
45	beetje vertrouwd	2	helemaal mee eens	5	helemaal niet	1	rewilding en feed your microbes	zeer waarschijnlijk	5	mee eens	4	Vezels
46	goed vertrouwd	4	helemaal mee eens	5	een beetje	2	het verbroken pact en requiem voor een microbe	zeer waarschijnlijk	5	helemaal mee eens	5	Microben zijn belangrijk voor je gezondheid
47	redelijk vertrouwd	3	helemaal mee oneens	1	helemaal niet	1	het verbroken pact en requiem voor een microbe	zeer waarschijnlijk	5	helemaal mee oneens	1	Dat ons hedendaags dieet destructief is voor gezonde darmmicroben
48	zeer vertrouwd	5	helemaal mee eens	5	sterk	4	het verbroken pact en requiem voor een microbe	misschien	3	helemaal mee eens	5	Kan jelpen
49	goed vertrouwd	4	helemaal mee eens	5	een beetje	2	rewilding en feed your microbes	waarschijnlijk	4	helemaal mee eens	5	Instemming
50	goed vertrouwd	4	helemaal mee eens	5	sterk	4	rewilding en feed your microbes	waarschijnlijk	4	mee eens	4	Het grote belang van juiste voeding v d darmmicroben en de eigen invloed verantwoordelijkheid daarin
51	redelijk vertrouwd	3	helemaal mee eens	5	een beetje	2	het verbroken pact en requiem voor een microbe	waarschijnlijk	4	mee eens	4	Fermenteer!
52	redelijk vertrouwd	3	helemaal mee eens	5	sterk	4				mee eens	4	Gezond eten blijft absolute noodzaak
53												Indrukwekkend
54	redelijk vertrouwd	3	mee eens	4	een beetje	2	symbiose	waarschijnlijk	4	helemaal mee eens	5	Kennisuitbreiding
55	goed vertrouwd	4	helemaal mee eens	5	sterk	4	rewilding en feed your microbes	waarschijnlijk	4	helemaal mee eens	5	Wisselwerking tussen hersenen en darmen
56	redelijk vertrouwd	3	mee eens	4	zeer sterk	5		zeer waarschijnlijk	5	mee eens	4	Muziek is goed voor de darmen
57	beetje vertrouwd	2	mee eens	4	een beetje	2	het ontstaan van het leven	waarschijnlijk	4	mee eens	4	Gezond eten
58	goed vertrouwd	4	helemaal mee eens	5	helemaal niet	1	rewilding en feed your microbes	zeer waarschijnlijk	5	mee eens	4	Vezels
59	redelijk vertrouwd	3	helemaal mee oneens	1	sterk	4	symbiose	waarschijnlijk	4	mee eens	4	Prima
60	zeer vertrouwd	5	helemaal mee eens	5	zeer sterk	5	symbiose	zeer waarschijnlijk	5	neutral	3	Fantastisch!
61	redelijk vertrouwd	3	helemaal mee eens	5	een beetje	2	het ontstaan van het leven	waarschijnlijk	4	mee eens	4	Indrukwekkend
62	beetje vertrouwd	2	mee eens	4	helemaal niet	1	rewilding en feed your microbes	onwwaarschijnlijk	2	neutral	3	Ingewikkelde materie
63	beetje vertrouwd	2	helemaal mee eens	5	een beetje	2	rewilding en feed your microbes	misschien	3	neutral	3	Indrukwekkend
64	beetje vertrouwd	2	mee eens	4	een beetje	2	het ontstaan van het leven	waarschijnlijk	4	mee oneens	2	Interessant
65	beetje vertrouwd	2	helemaal mee oneens	1	sterk	4	het ontstaan van het leven	waarschijnlijk	4	helemaal mee eens	5	Genoten van de prachtige voorstelling. De kennis was bekend.

## Sheet: All_pre_90
row	fam_raw	fam	imp_raw	imp	fib_raw	fib
1	zeer vertrouwd	5	helemaal mee eens	5	6 porties of meer (20 gram of meer)	4
2	goed vertrouwd	4	helemaal mee eens	5	4 tot 5 porties (ongeveer 12 tot 20 gram)	3
3	goed vertrouwd	4	helemaal mee eens	5	2 tot 3 porties (ongeveer 6 tot 12 gram)	2
4	goed vertrouwd	4	helemaal mee eens	5	4 tot 5 porties (ongeveer 12 tot 20 gram)	3
5	helemaal niet vertrouwd	1	mee eens	4	2 tot 3 porties (ongeveer 6 tot 12 gram)	2
6	goed vertrouwd	4	helemaal mee eens	5	2 tot 3 porties (ongeveer 6 tot 12 gram)	2
7	goed vertrouwd	4	helemaal mee eens	5	2 tot 3 porties (ongeveer 6 tot 12 gram)	2
8	beetje vertrouwd	2	helemaal mee eens	5	4 tot 5 porties (ongeveer 12 tot 20 gram)	3
9	zeer vertrouwd	5	helemaal mee eens	5	6 porties of meer (20 gram of meer)	4
10	helemaal niet vertrouwd	1	mee eens	4	2 tot 3 porties (ongeveer 6 tot 12 gram)	2
11	goed vertrouwd	4	helemaal mee eens	5	6 porties of meer (20 gram of meer)	4
12	beetje vertrouwd	2	helemaal mee oneens	1	4 tot 5 porties (ongeveer 12 tot 20 gram)	3
13	beetje vertrouwd	2	mee eens	4	4 tot 5 porties (ongeveer 12 tot 20 gram)	3
14	beetje vertrouwd	2	helemaal mee eens	5	2 tot 3 porties (ongeveer 6 tot 12 gram)	2
15	goed vertrouwd	4	helemaal mee eens	5	4 tot 5 porties (ongeveer 12 tot 20 gram)	3
16	redelijk vertrouwd	3	helemaal mee eens	5	2 tot 3 porties (ongeveer 6 tot 12 gram)	2
17	zeer vertrouwd	5	helemaal mee eens	5	6 porties of meer (20 gram of meer)	4
18	beetje vertrouwd	2	helemaal mee eens	5	4 tot 5 porties (ongeveer 12 tot 20 gram)	3
19	redelijk vertrouwd	3	helemaal mee eens	5	4 tot 5 porties (ongeveer 12 tot 20 gram)	3
20	beetje vertrouwd	2	helemaal mee oneens	1	6 porties of meer (20 gram of meer)	4
21	beetje vertrouwd	2	mee eens	4	6 porties of meer (20 gram of meer)	4
22	helemaal niet vertrouwd	1	mee eens	4	4 tot 5 porties (ongeveer 12 tot 20 gram)	3
23	helemaal niet vertrouwd	1	helemaal mee eens	5	4 tot 5 porties (ongeveer 12 tot 20 gram)	3
24	beetje vertrouwd	2	helemaal mee eens	5	4 tot 5 porties (ongeveer 12 tot 20 gram)	3
25	helemaal niet vertrouwd	1	helemaal mee eens	5	2 tot 3 porties (ongeveer 6 tot 12 gram)	2
26	redelijk vertrouwd	3	helemaal mee eens	5	2 tot 3 porties (ongeveer 6 tot 12 gram)	2
27	beetje vertrouwd	2	mee eens	4	2 tot 3 porties (ongeveer 6 tot 12 gram)	2
28	beetje vertrouwd	2	mee eens	4	4 tot 5 porties (ongeveer 12 tot 20 gram)	3
29	beetje vertrouwd	2	helemaal mee oneens	1	6 porties of meer (20 gram of meer)	4
30	goed vertrouwd	4	helemaal mee eens	5	2 tot 3 porties (ongeveer 6 tot 12 gram)	2
31	redelijk vertrouwd	3	helemaal mee eens	5	4 tot 5 porties (ongeveer 12 tot 20 gram)	3
32	redelijk vertrouwd	3	helemaal mee eens	5	2 tot 3 porties (ongeveer 6 tot 12 gram)	2
33	beetje vertrouwd	2	helemaal mee eens	5	4 tot 5 porties (ongeveer 12 tot 20 gram)	3
34	redelijk vertrouwd	3	helemaal mee eens	5	2 tot 3 porties (ongeveer 6 tot 12 gram)	2
35	beetje vertrouwd	2	helemaal mee eens	5	4 tot 5 porties (ongeveer 12 tot 20 gram)	3
36	beetje vertrouwd	2	helemaal mee eens	5	2 tot 3 porties (ongeveer 6 tot 12 gram)	2
37	beetje vertrouwd	2	mee eens	4	6 porties of meer (20 gram of meer)	4
38	redelijk vertrouwd	3	helemaal mee eens	5	4 tot 5 porties (ongeveer 12 tot 20 gram)	3
39	beetje vertrouwd	2	mee eens	4	4 tot 5 porties (ongeveer 12 tot 20 gram)	3
40	redelijk vertrouwd	3	helemaal mee eens	5	2 tot 3 porties (ongeveer 6 tot 12 gram)	2
41	beetje vertrouwd	2	helemaal mee eens	5	4 tot 5 porties (ongeveer 12 tot 20 gram)	3
42	beetje vertrouwd	2	helemaal mee eens	5	2 tot 3 porties (ongeveer 6 tot 12 gram)	2
43	helemaal niet vertrouwd	1	helemaal mee eens	5	2 tot 3 porties (ongeveer 6 tot 12 gram)	2
44	redelijk vertrouwd	3	helemaal mee eens	5	4 tot 5 porties (ongeveer 12 tot 20 gram)	3
45	redelijk vertrouwd	3	helemaal mee eens	5	2 tot 3 porties (ongeveer 6 tot 12 gram)	2
46	beetje vertrouwd	2	helemaal mee eens	5	4 tot 5 porties (ongeveer 12 tot 20 gram)	3
47	redelijk vertrouwd	3	mee eens	4	6 porties of meer (20 gram of meer)	4
48	redelijk vertrouwd	3	mee eens	4	2 tot 3 porties (ongeveer 6 tot 12 gram)	2
49	helemaal niet vertrouwd	1	helemaal mee eens	5	2 tot 3 porties (ongeveer 6 tot 12 gram)	2
50	beetje vertrouwd	2	mee eens	4	4 tot 5 porties (ongeveer 12 tot 20 gram)	3
51	beetje vertrouwd	2	helemaal mee eens	5	6 porties of meer (20 gram of meer)	4
52	beetje vertrouwd	2	mee eens	4	2 tot 3 porties (ongeveer 6 tot 12 gram)	2
53	redelijk vertrouwd	3	helemaal mee eens	5	4 tot 5 porties (ongeveer 12 tot 20 gram)	3
54	beetje vertrouwd	2	mee eens	4	6 porties of meer (20 gram of meer)	4
55	beetje vertrouwd	2	mee eens	4	2 tot 3 porties (ongeveer 6 tot 12 gram)	2
56	goed vertrouwd	4	helemaal mee eens	5	4 tot 5 porties (ongeveer 12 tot 20 gram)	3
57	helemaal niet vertrouwd	1	neutraal	3	4 tot 5 porties (ongeveer 12 tot 20 gram)	3
58	redelijk vertrouwd	3	helemaal mee eens	5	4 tot 5 porties (ongeveer 12 tot 20 gram)	3
59	beetje vertrouwd	2	helemaal mee eens	5	4 tot 5 porties (ongeveer 12 tot 20 gram)	3
60	beetje vertrouwd	2	mee eens	4	4 tot 5 porties (ongeveer 12 tot 20 gram)	3
61	beetje vertrouwd	2	helemaal mee eens	5	4 tot 5 porties (ongeveer 12 tot 20 gram)	3
62	beetje vertrouwd	2	helemaal mee eens	5	2 tot 3 porties (ongeveer 6 tot 12 gram)	2
63	helemaal niet vertrouwd	1	mee eens	4	6 porties of meer (20 gram of meer)	4
64	beetje vertrouwd	2	helemaal mee eens	5	2 tot 3 porties (ongeveer 6 tot 12 gram)	2
65	helemaal niet vertrouwd	1	helemaal mee eens	5	2 tot 3 porties (ongeveer 6 tot 12 gram)	2
66	beetje vertrouwd	2	mee eens	4	6 porties of meer (20 gram of meer)	4
67	helemaal niet vertrouwd	1	mee oneens	2	2 tot 3 porties (ongeveer 6 tot 12 gram)	2
68	beetje vertrouwd	2	helemaal mee eens	5	6 porties of meer (20 gram of meer)	4
69	helemaal niet vertrouwd	1	helemaal mee eens	5	2 tot 3 porties (ongeveer 6 tot 12 gram)	2
70	helemaal niet vertrouwd	1	mee eens	4	2 tot 3 porties (ongeveer 6 tot 12 gram)	2
71	helemaal niet vertrouwd	1	helemaal mee eens	5	4 tot 5 porties (ongeveer 12 tot 20 gram)	3
72	beetje vertrouwd	2	mee eens	4	4 tot 5 porties (ongeveer 12 tot 20 gram)	3
73	redelijk vertrouwd	3	mee eens	4	4 tot 5 porties (ongeveer 12 tot 20 gram)	3
74	helemaal niet vertrouwd	1	helemaal mee eens	5	4 tot 5 porties (ongeveer 12 tot 20 gram)	3
75	beetje vertrouwd	2	helemaal mee eens	5	4 tot 5 porties (ongeveer 12 tot 20 gram)	3
76	goed vertrouwd	4	neutraal	3	2 tot 3 porties (ongeveer 6 tot 12 gram)	2
77	beetje vertrouwd	2	helemaal mee eens	5	6 porties of meer (20 gram of meer)	4
78	redelijk vertrouwd	3	helemaal mee eens	5	6 porties of meer (20 gram of meer)	4
79	helemaal niet vertrouwd	1	helemaal mee eens	5	4 tot 5 porties (ongeveer 12 tot 20 gram)	3
80	beetje vertrouwd	2	helemaal mee oneens	1	2 tot 3 porties (ongeveer 6 tot 12 gram)	2
81	goed vertrouwd	4	helemaal mee eens	5	6 porties of meer (20 gram of meer)	4
82	goed vertrouwd	4	helemaal mee eens	5	6 porties of meer (20 gram of meer)	4
83	beetje vertrouwd	2	helemaal mee eens	5	4 tot 5 porties (ongeveer 12 tot 20 gram)	3
84	redelijk vertrouwd	3	helemaal mee eens	5	6 porties of meer (20 gram of meer)	4
85	redelijk vertrouwd	3	helemaal mee eens	5	4 tot 5 porties (ongeveer 12 tot 20 gram)	3
86	helemaal niet vertrouwd	1	helemaal mee oneens	1	2 tot 3 porties (ongeveer 6 tot 12 gram)	2
87	goed vertrouwd	4	helemaal mee eens	5	2 tot 3 porties (ongeveer 6 tot 12 gram)	2
88	redelijk vertrouwd	3	helemaal mee eens	5	2 tot 3 porties (ongeveer 6 tot 12 gram)	2
89	redelijk vertrouwd	3	helemaal mee oneens	1	4 tot 5 porties (ongeveer 12 tot 20 gram)	3
90	beetje vertrouwd	2	helemaal mee eens	5	4 tot 5 porties (ongeveer 12 tot 20 gram)	3

## Sheet: Familiarity_W
Familiarity with the gut microbiome (1–5)
Wilcoxon signed-rank, paired by pair_id. Each row pulls live from Paired_53.
pair_id	pre	post	diff = post – pre	|diff|	sign	rank of |diff| (mid-ranks, zeros excluded)	rank if diff > 0	rank if diff < 0
P01	3	3	0		0		0	0
P02	4	4	0		0		0	0
P03	3	4	1	1	1	11.5	11.5	0
P04	2	2	0		0		0	0
P05	3	2	-1	1	-1	11.5	0	11.5
P06	2	3	1	1	1	11.5	11.5	0
P07	2	2	0		0		0	0
P08	2	4	2	2	1	27	27	0
P09	2	4	2	2	1	27	27	0
P10	2	3	1	1	1	11.5	11.5	0
P11	4	4	0		0		0	0
P12	2	2	0		0		0	0
P13	2	2	0		0		0	0
P14	4	4	0		0		0	0
P15	3	3	0		0		0	0
P16	2	3	1	1	1	11.5	11.5	0
P17	2	4	2	2	1	27	27	0
P18	1	2	1	1	1	11.5	11.5	0
P19	2	2	0		0		0	0
P20	3	3	0		0		0	0
P21	2	2	0		0		0	0
P22	2	3	1	1	1	11.5	11.5	0
P23	1	2	1	1	1	11.5	11.5	0
P24	3	3	0		0		0	0
P25	2	4	2	2	1	27	27	0
P26	1	2	1	1	1	11.5	11.5	0
P27	3	5	2	2	1	27	27	0
P28	3	4	1	1	1	11.5	11.5	0
P29	5	5	0		0		0	0
P30	2	3	1	1	1	11.5	11.5	0
P31	4	4	0		0		0	0
P32	2	3	1	1	1	11.5	11.5	0
P33	1	2	1	1	1	11.5	11.5	0
P34	1	2	1	1	1	11.5	11.5	0
P35	1	1	0		0		0	0
P36	3	3	0		0		0	0
P37	5	5	0		0		0	0
P38	1	2	1	1	1	11.5	11.5	0
P39	4	5	1	1	1	11.5	11.5	0
P40	4	5	1	1	1	11.5	11.5	0
P41	1	2	1	1	1	11.5	11.5	0
P42	2	3	1	1	1	11.5	11.5	0
P43	2	4	2	2	1	27	27	0
P44	1	2	1	1	1	11.5	11.5	0
P45	2	4	2	2	1	27	27	0
P46	2	2	0		0		0	0
P47	3	3	0		0		0	0
P48	3	3	0		0		0	0
P49	1	4	3	3	1	32	32	0
P50	2	4	2	2	1	27	27	0
P51	2	4	2	2	1	27	27	0
P52	3	4	1	1	1	11.5	11.5	0
P53	2	3	1	1	1	11.5	11.5	0
Summary
n (paired records)	53
n (non-zero differences)	32
Increased (post > pre)	31
Decreased (post < pre)	1
Unchanged	21
Mean pre	2.37736
Mean post	3.15094
Median pre	2
Median post	3
Mean difference (post – pre)	0.773585
W+ (sum of ranks for positive diffs)	516.5
W– (sum of ranks for negative diffs)	11.5
W = min(W+, W–)	11.5
Normal-approx mean μ = n(n+1)/4	264
Normal-approx SD σ = √(n(n+1)(2n+1)/24)	53.479
z = (W − μ) / σ	-4.72148
Two-tailed p (normal approx., no tie corr.)	2.34132e-06
From analysis script (R/Python, with tie correction)
W (matches min of W+, W–)	11.5
p-value (reported in manuscript)	8.24e-07
Note: the normal-approximation p above is computed without tie correction and will differ slightly from the script's value, which uses tie correction. Both fall well below 0.001 for familiarity and below 0.05 for importance.

## Sheet: Importance_W
Microbial diversity matters for health (1–5)
Wilcoxon signed-rank, paired by pair_id. Each row pulls live from Paired_53.
pair_id	pre	post	diff = post – pre	|diff|	sign	rank of |diff| (mid-ranks, zeros excluded)	rank if diff > 0	rank if diff < 0
P01	5	5	0		0		0	0
P02	5	5	0		0		0	0
P03	5	5	0		0		0	0
P04	4	5	1	1	1	8.5	8.5	0
P05	5	5	0		0		0	0
P06	4	5	1	1	1	8.5	8.5	0
P07	5	5	0		0		0	0
P08	4	5	1	1	1	8.5	8.5	0
P09	5	5	0		0		0	0
P10	1	1	0		0		0	0
P11	5	5	0		0		0	0
P12	4	5	1	1	1	8.5	8.5	0
P13	5	5	0		0		0	0
P14	5	5	0		0		0	0
P15	5	4	-1	1	-1	8.5	0	8.5
P16	5	5	0		0		0	0
P17	4	5	1	1	1	8.5	8.5	0
P18	5	4	-1	1	-1	8.5	0	8.5
P19	5	5	0		0		0	0
P20	5	5	0		0		0	0
P21	4	4	0		0		0	0
P22	5	4	-1	1	-1	8.5	0	8.5
P23	5	5	0		0		0	0
P24	5	5	0		0		0	0
P25	5	5	0		0		0	0
P26	4	4	0		0		0	0
P27	5	5	0		0		0	0
P28	4	5	1	1	1	8.5	8.5	0
P29	5	5	0		0		0	0
P30	1	1	0		0		0	0
P31	5	5	0		0		0	0
P32	5	5	0		0		0	0
P33	4	5	1	1	1	8.5	8.5	0
P34	4	5	1	1	1	8.5	8.5	0
P35	3	4	1	1	1	8.5	8.5	0
P36	4	5	1	1	1	8.5	8.5	0
P37	5	5	0		0		0	0
P38	5	5	0		0		0	0
P39	5	5	0		0		0	0
P40	5	5	0		0		0	0
P41	5	5	0		0		0	0
P42	5	5	0		0		0	0
P43	5	5	0		0		0	0
P44	4	5	1	1	1	8.5	8.5	0
P45	5	5	0		0		0	0
P46	4	5	1	1	1	8.5	8.5	0
P47	5	5	0		0		0	0
P48	5	5	0		0		0	0
P49	5	5	0		0		0	0
P50	4	5	1	1	1	8.5	8.5	0
P51	5	5	0		0		0	0
P52	5	5	0		0		0	0
P53	4	4	0		0		0	0
Summary
n (paired records)	53
n (non-zero differences)	16
Increased (post > pre)	13
Decreased (post < pre)	3
Unchanged	37
Mean pre	4.5283
Mean post	4.71698
Median pre	5
Median post	5
Mean difference (post – pre)	0.188679
W+ (sum of ranks for positive diffs)	110.5
W– (sum of ranks for negative diffs)	25.5
W = min(W+, W–)	25.5
Normal-approx mean μ = n(n+1)/4	68
Normal-approx SD σ = √(n(n+1)(2n+1)/24)	19.3391
z = (W − μ) / σ	-2.19762
Two-tailed p (normal approx., no tie corr.)	0.027976
From analysis script (R/Python, with tie correction)
W (matches min of W+, W–)	25.5
p-value (reported in manuscript)	0.012
Note: the normal-approximation p above is computed without tie correction and will differ slightly from the script's value, which uses tie correction. Both fall well below 0.001 for familiarity and below 0.05 for importance.

## Sheet: Memorable_chi2
Most memorable act – chi-square goodness-of-fit (vs uniform)
Computed on the full post sample (All_post_65, column H).
Act	Observed (n)	Observed (%)	Expected (n) = total/5	(O−E)²/E
rewilding en feed your microbes	26	0.42623	12.2	15.6098
het verbroken pact en requiem voor een microbe	17	0.278689	12.2	1.88852
symbiose	8	0.131148	12.2	1.4459
het ontstaan van het leven	7	0.114754	12.2	2.21639
de mens als holobiont	3	0.0491803	12.2	6.9377
Total (respondents who answered Q5)	61	1	61	28.0984
Test statistic
χ²	28.0984
df (k − 1)	4
p-value (CHISQ.DIST.RT)	1.19133e-05

## Sheet: Post_only
Post-only descriptives (full post sample, N = 65)
Requiem emotional impact (Q4)
Likert value	Label	Count	Percent
1	helemaal niet	11	0.171875
2	een beetje	21	0.328125
3	matig	10	0.15625
4	sterk	20	0.3125
5	zeer sterk	2	0.03125
Total		64	1
Mean	2.70312
Median	2.5
SD	1.17756
N (non-blank)	64
Top-2 (4 + 5) count	22
Top-2 (4 + 5) percent of valid	0.34375
Feed Your Microbes intention (Q6)
Likert value	Label	Count	Percent
1	zeer onwaarschijnlijk	2	0.031746
2	onwaarschijnlijk	3	0.047619
3	misschien	19	0.301587
4	waarschijnlijk	25	0.396825
5	zeer waarschijnlijk	14	0.222222
Total		63	1
Mean	3.73016
Median	4
SD	0.970639
N (non-blank)	63
Top-2 (4 + 5) count	39
Top-2 (4 + 5) percent of valid	0.619048
Fibre-health insight (Q7)
Likert value	Label	Count	Percent
1	helemaal mee oneens	3	0.046875
2	mee oneens	1	0.015625
3	neutraal	5	0.078125
4	mee eens	23	0.359375
5	helemaal mee eens	32	0.5
Total		64	1
Mean	4.25
Median	4.5
SD	1.00791
N (non-blank)	64
Top-2 (4 + 5) count	55
Top-2 (4 + 5) percent of valid	0.859375

## Sheet: Fibre_baseline
Fibre baseline (pre-survey, N = 90 valid responses)
From All_pre_90, column G (numeric fibre category).
Category	Label	Count	Percent
1	0–1 portion (<5 g)	0	0
2	2–3 portions (6–12 g)	33	0.366667
3	4–5 portions (12–20 g)	38	0.422222
4	≥6 portions (≥20 g)	19	0.211111
Total		90	1
Below Dutch Health Council recommendation (cat 1 + 2, i.e., < ~12 g/day)		33	0.366667

## Sheet: Words
One-word takeaways (Q8 post)
Verbatim list and lowercased frequency count.
# verbatim	response (lowercased, punctuation stripped)		response	count
1	mooi		interessant	4
2	interessant		vezels	4
3	voed je microben en zij voeden jou met een betere gezindheid		indrukwekkend	3
4	prima ga zo door		gezond eten	2
5	besef		mooi	1
6	zorg voor je microben in je darm		voed je microben en zij voeden jou met een betere gezindheid	1
7	ik doe graag mee aan het onderzoek		prima ga zo door	1
8	goed over eten nadenken		besef	1
9	inspirerend		zorg voor je microben in je darm	1
10	nog meer plantaardig eten en zo min mogelijk bewerkt voedsel		ik doe graag mee aan het onderzoek	1
11	nieuwsgierigheid		goed over eten nadenken	1
12	enorme importantie van microben in onze darmen		inspirerend	1
13	meer vragen dan antwoorden		nog meer plantaardig eten en zo min mogelijk bewerkt voedsel	1
14	onverminderde nieuwsgierigheid		nieuwsgierigheid	1
15	bacterin microben worden onterecht als vies gezien ze zijn veel te nuttig		enorme importantie van microben in onze darmen	1
16	hoe fragiel het evenwicht in de darm is		meer vragen dan antwoorden	1
17	holobiont		onverminderde nieuwsgierigheid	1
18	aan de slag		bacterin microben worden onterecht als vies gezien ze zijn veel te nuttig	1
19	nieuwsgierigheid welke bacterin ik heb en welke ik mis		hoe fragiel het evenwicht in de darm is	1
20	aandacht		holobiont	1
21	interessant		aan de slag	1
22	belangrijk		nieuwsgierigheid welke bacterin ik heb en welke ik mis	1
23	nog meer vezels eten		aandacht	1
24	inspired		belangrijk	1
25	gezond eten		nog meer vezels eten	1
26	biodiversiteit		inspired	1
27	vezels		biodiversiteit	1
28	vezelrijk		vezelrijk	1
29	bijzonder		bijzonder	1
30	oerbacterie		oerbacterie	1
31	vezels		vezelrijke voeding	1
32	vezelrijke voeding		ons microbioom lijkt ideaal gesproken op ons sterrenstelsel	1
33	ons microbioom lijkt ideaal gesproken op ons sterrenstelsel		hoop	1
34	hoop		jas	1
35	jas		fascinerend	1
36	interessant		mijn darmen nog beter voeden en mijn kinderen inspireren om ook hun darmen te voeden en hierdoor andere keuzes te maken	1
37	fascinerend		microben zijn belangrijk voor je gezondheid	1
38	mijn darmen nog beter voeden en mijn kinderen inspireren om ook hun darmen te voeden en hierdoor andere keuzes te maken		dat ons hedendaags dieet destructief is voor gezonde darmmicroben	1
39	vezels		kan jelpen	1
40	microben zijn belangrijk voor je gezondheid		instemming	1
41	dat ons hedendaags dieet destructief is voor gezonde darmmicroben		het grote belang van juiste voeding v d darmmicroben en de eigen invloed verantwoordelijkheid daarin	1
42	kan jelpen		fermenteer	1
43	instemming		gezond eten blijft absolute noodzaak	1
44	het grote belang van juiste voeding v d darmmicroben en de eigen invloed verantwoordelijkheid daarin		kennisuitbreiding	1
45	fermenteer		wisselwerking tussen hersenen en darmen	1
46	gezond eten blijft absolute noodzaak		muziek is goed voor de darmen	1
47	indrukwekkend		prima	1
48	kennisuitbreiding		fantastisch	1
49	wisselwerking tussen hersenen en darmen		ingewikkelde materie	1
50	muziek is goed voor de darmen		genoten van de prachtige voorstelling de kennis was bekend	1
51	gezond eten
52	vezels
53	prima
54	fantastisch
55	indrukwekkend
56	ingewikkelde materie
57	indrukwekkend
58	interessant
59	genoten van de prachtige voorstelling de kennis was bekend
