# Supplementary material
Source: Research Square preprint supplement (doi:10.21203/rs.3.rs-9948269/v1)
Supplement: Supplementary file 1 [file 5871773ca544dc3a8b73256f.docx]

***— Original Dutch version follows the English translation below—***

**Symbiosis: pre- and post-performance questionnaire**

*ARTIS-Planetarium, 18 May 2026, in Qualtrics*

This is an English translation of the Dutch questionnaire deployed at the 18 May 2026 staging. The Dutch original above is the version actually presented to the audience. The translation preserves item order, response options, item type, and the design rationale notes in italics.

**Two-survey design**

Two separate Qualtrics surveys were created: 'Symbiosis Pre' and 'Symbiosis Post'. Both opened with the same mandatory item: a four-digit personal code. Two QR codes were projected on the planetarium dome on 18 May, one before the performance and one immediately after. Both surveys were exported as CSV, and records were paired via the four-digit code in R, Python, or SPSS. This is sufficiently anonymous for publication and simple to administer.

**Scoring and analysis**

Likert items are scored 1 to 5. Question 3 uses a four-point scale for fibre intake, with gram-band labels. The primary analysis is the paired difference score between pre- and post-measurements for the two repeated items (familiarity with the gut microbiome, question 1 and question 5; importance of microbial diversity, question 2 and question 6). The test is the Wilcoxon signed-rank test on paired differences. Target: at least 50 paired respondents. At a venue capacity of about 120 and an expected response rate of 50 to 70 per cent, this threshold is achievable. The behavioural intention items on fibre and fermented foods were deliberately omitted from the post-survey to avoid premature behaviour change before the controlled four-week Feed Your Microbes intervention itself begins; this leaves the campaign as the gated starting point for behavioural measurement. Question 10 instead captures cognitive uptake (insight that increasing fibre is beneficial for health) as a directly performance-bound outcome measure.

**Survey 1 (Pre), before the performance, approximately 45 seconds**

**Welcome screen, first page of the pre-survey**

Welcome to Symbiosis. A short study is attached to this performance. Three items before the performance, eight after. Your responses contribute to a scientific article on how a planetarium performance can help draw attention to microbial biodiversity within the human body.

First, choose a personal four-digit code. For example, the year of your first trip abroad, the last four digits of your phone number, or any number you will remember after the performance. You will enter the same code again after the performance, so that we can link your responses anonymously.

The citizen science Symbiosis advocates begins tonight. With you, here.

**Question 0 (Pre) · Text entry, single line, validation: exactly 4 digits, required**

Choose a personal four-digit code and remember it for after the performance.

*Note: Join key for pre/post pairing. In Qualtrics: text entry with content validation 'Number, must be exactly 4 digits'. Force response.*

**Question 1 (Pre) · Likert single answer, 5 points**

How familiar are you with the human gut microbiome?

• 1: Not at all familiar

• 2: A little familiar

• 3: Reasonably familiar

• 4: Well familiar

• 5: Very familiar

*Note: Repeated after the performance (question 5). Primary outcome measure for cognitive shift.*

**Question 2 (Pre) · Likert single answer, 5 points**

Microbial diversity in the gut is important for human health.

• 1: Strongly disagree

• 2: Disagree

• 3: Neutral

• 4: Agree

• 5: Strongly agree

*Note: Repeated after the performance (question 6). Primary outcome measure for attitudinal shift.*

**Question 3 (Pre) · Multiple choice, 1 answer, 4 options**

How many portions of fibre-rich foods (whole grains, legumes, nuts, vegetables, fruit) do you eat on an average day? The Dutch Health Council recommends 30 grams of fibre per day for women and 40 grams for men. The average Dutch adult intake is approximately 21 grams. One portion delivers on average 3 to 4 grams of fibre.

• 0 to 1 portion (less than 5 grams of fibre per day)

• 2 to 3 portions (approximately 6 to 12 grams)

• 4 to 5 portions (approximately 12 to 20 grams)

• 6 portions or more (20 grams or more)

*Note: Baseline measurement for the Feed Your Microbes context. The gram-bands in the response options allow the audience to compare themselves directly against the recommendation, and enable the paper to report the proportion of respondents below the 30 g (women) and 40 g (men) thresholds.*

**Transition screen, end of pre-survey**

Thank you. Enjoy Symbiosis. See you after the performance.

**Survey 2 (Post), after the performance, approximately 2 to 3 minutes**

**Welcome screen, first page of the post-survey**

Welcome back. Eight short items. Re-enter your four-digit code, the same one as at the start, so that we can link your two responses anonymously.

**Question 4 (Post) · Text entry, single line, validation: exactly 4 digits, required**

Enter your four-digit code, the same as before the performance.

*Note: Join key for pre/post pairing. Same validation as question 0.*

**Question 5 (Post) · Likert single answer, 5 points (identical to question 1)**

How familiar do you feel now with the human gut microbiome?

• 1: Not at all familiar

• 2: A little familiar

• 3: Reasonably familiar

• 4: Well familiar

• 5: Very familiar

*Note: Paired with question 1.*

**Question 6 (Post) · Likert single answer, 5 points (identical to question 2)**

Microbial diversity in the gut is important for human health.

• 1: Strongly disagree

• 2: Disagree

• 3: Neutral

• 4: Agree

• 5: Strongly agree

*Note: Paired with question 2.*

**Question 7 (Post) · Likert single answer, 5 points**

The Requiem for a Microbe moved me emotionally.

• 1: Not at all

• 2: A little

• 3: Moderately

• 4: Strongly

• 5: Very strongly

*Note: Measures the affective effect of the central mourning act.*

**Question 8 (Post) · Multiple choice, 1 answer, 5 options**

Which act was most memorable for you?

• 1. The origin of life

• 2. Symbiosis

• 3. The human as holobiont

• 4. The Broken Pact and Requiem for a Microbe

• 5. Rewilding and Feed Your Microbes

*Note: Triangulates self-reported memorability per act.*

**Question 9 (Post) · Likert single answer, 5 points**

I intend to enrol in the Feed Your Microbes citizen science project.

• 1: Very unlikely

• 2: Unlikely

• 3: Maybe

• 4: Likely

• 5: Very likely

*Note: Primary intention measure for the behavioural change the performance aims to support.*

**Question 10 (Post) · Likert single answer, 5 points**

I have come to the insight that increasing fibre intake is beneficial for health.

• 1: Strongly disagree

• 2: Disagree

• 3: Neutral

• 4: Agree

• 5: Strongly agree

*Note: Cognitive measure for message uptake. Deliberately framed as insight (cognitive) rather than intention (behavioural) so that respondents do not change their diet before the Feed Your Microbes challenge starts. This keeps Feed Your Microbes as the gated behavioural starting point.*

**Question 11 (Post) · Text entry, single line, max one word**

In one word: what do you take with you from the performance tonight?

*Note: For a live wordcloud on the dome at closing, Qualtrics has no native support. Two options: generate the wordcloud post-hoc from the text export (in R via wordcloud2, or via wordart.com), or create a separate Mentimeter slide solely for this last question alongside the Qualtrics survey, for the theatrical close. The Qualtrics data remain the basis for the paper, with Mentimeter only for in-room visualisation.*

**Privacy and ethics**

No personal data are collected. The four-digit code is not traceable to an individual. The welcome screen explicitly states the purpose (data collection for a scientific article). Qualtrics survey settings: anonymous, no IP address recorded, no geolocation.

# Symbiose, vragenlijst voor en na de voorstelling

*ARTIS-Planetarium, 18 mei 2026, in Qualtrics*

Onderstaande tekst kunt u rechtstreeks per vraag in Qualtrics kopiëren en plakken. De volgorde van vragen, de typeaanduidingen en de antwoordopties zijn ongewijzigd over te nemen.

## Opzet in twee surveys

Maak twee aparte Qualtrics-surveys: 'Symbiose Pre' en 'Symbiose Post'. Beide beginnen met dezelfde verplichte vraag naar een viercijferige persoonlijke code. Plaats voor 18 mei in het ARTIS-Planetarium twee QR-codes op de koepel: één voorafgaand aan de voorstelling, één direct erna. Na afloop exporteert u beide surveys als CSV en koppelt u de records via de viercijferige code in R, Python of SPSS. Dit is voldoende anoniem voor publicatie en eenvoudig in onderhoud.

## Beoordeling en analyse

Likert-items worden gescoord op een schaal van 1 tot 5. Vraag 3 is een 4-puntsschaal voor vezelinname, met gram-bandbreedtes als label. De primaire analyse is de paarsgewijze verschilscore tussen de pre- en post-meting voor de twee herhaalde items (vertrouwdheid met het microbioom, vraag 1 en vraag 5; belang van microbiële diversiteit, vraag 2 en vraag 6). Toets met de Wilcoxon signed-rank test op de paarsgewijze verschillen. Doelstelling: minimaal 50 gekoppelde respondenten. Bij een capaciteit van circa 120 plekken en een verwachte responsratio van 50 tot 70 procent is deze drempel haalbaar. De gedragsintentie-vragen over vezels en gefermenteerde voedingsmiddelen zijn bewust uit de post-survey weggelaten om voortijdige gedragsverandering te voorkomen; Feed Your Microbes blijft daarmee het gecontroleerde startpunt voor de gedragsmeting. In plaats daarvan meet vraag 10 de cognitieve uptake (inzicht in de gezondheidswaarde van vezels) als directe, voorstelling-gebonden uitkomstmaat.

# Survey 1 (pre), voor de voorstelling, ca. 45 seconden

**Welkomstscherm, eerste pagina van de pre-survey**

Welkom bij Symbiose. Aan deze voorstelling is een kort onderzoek gekoppeld. Drie vragen voor de voorstelling, acht erna. Wat u invult, draagt bij aan een wetenschappelijk artikel over hoe een planetariumvoorstelling kan helpen om aandacht te vragen voor de microbiële biodiversiteit binnen ons lichaam.

Kies eerst een persoonlijke viercijferige code. Bijvoorbeeld het jaar van uw eerste reis, de laatste vier cijfers van uw telefoonnummer, of een willekeurig getal dat u zich na de voorstelling weer herinnert. Diezelfde code gebruikt u na de voorstelling opnieuw, zodat we uw antwoorden anoniem aan elkaar kunnen koppelen.

De burgerwetenschap waarvoor Symbiose pleit, begint vanavond. Met u, hier.

**Vraag 0 (Pre)** · *Text entry, single line, validatie: precies 4 cijfers, verplicht*

Kies een viercijferige persoonlijke code en onthoud die voor na de voorstelling.

***Toelichting:*** *Joinkenmerk voor de koppeling pre-post. In Qualtrics: text entry met content validation 'Number, must be exactly 4 digits'. Verplicht stellen via 'force response'.*

**Vraag 1 (Pre)** · *Likert single answer, 5 punten*

Hoe vertrouwd bent u met het menselijk darmmicrobioom?

- 1: Helemaal niet vertrouwd
- 2: Beetje vertrouwd
- 3: Redelijk vertrouwd
- 4: Goed vertrouwd
- 5: Zeer vertrouwd

***Toelichting:*** *Wordt na de voorstelling herhaald (vraag 5). Primaire uitkomstmaat voor cognitieve verschuiving.*

**Vraag 2 (Pre)** · *Likert single answer, 5 punten*

Microbiële diversiteit in de darm is belangrijk voor de menselijke gezondheid.

- 1: Helemaal mee oneens
- 2: Mee oneens
- 3: Neutraal
- 4: Mee eens
- 5: Helemaal mee eens

***Toelichting:*** *Wordt na de voorstelling herhaald (vraag 6). Primaire uitkomstmaat voor attitudeverschuiving.*

**Vraag 3 (Pre)** · *Multiple choice, 1 antwoord, 4 opties*

Hoeveel porties vezelrijke voedingsmiddelen (volkoren producten, peulvruchten, noten, groente, fruit) eet u op een gemiddelde dag? De Gezondheidsraad beveelt 30 gram vezels per dag aan voor vrouwen en 40 gram voor mannen. De gemiddelde Nederlander komt op ongeveer 21 gram. Eén portie levert gemiddeld 3 tot 4 gram vezels.

- 0 tot 1 portie (minder dan 5 gram vezels per dag)
- 2 tot 3 porties (ongeveer 6 tot 12 gram)
- 4 tot 5 porties (ongeveer 12 tot 20 gram)
- 6 porties of meer (20 gram of meer)

***Toelichting:*** *Baselinemeting voor de Feed Your Microbes-context. De gram-bandbreedtes in de antwoordopties geven de audience een directe vergelijking met de aanbeveling, en stellen u in staat om in de paper het percentage respondenten onder de 30 gram (vrouwen) en 40 gram (mannen) drempel te rapporteren.*

**Tussenscherm, einde pre-survey**

Dank u. Geniet van Symbiose. Tot na de voorstelling.

# Survey 2 (post), na de voorstelling, ca. 2 tot 3 minuten

**Welkomstscherm, eerste pagina van de post-survey**

Welkom terug. Acht korte vragen. Voer uw viercijferige code opnieuw in, dezelfde als aan het begin, zodat we uw twee antwoorden anoniem kunnen koppelen.

**Vraag 4 (Post)** · *Text entry, single line, validatie: precies 4 cijfers, verplicht*

Voer uw viercijferige code in, dezelfde als voor de voorstelling.

***Toelichting:*** *Joinkenmerk voor de koppeling pre-post. Identieke validatie als vraag 0.*

**Vraag 5 (Post)** · *Likert single answer, 5 punten (gelijk aan vraag 1)*

Hoe vertrouwd voelt u zich nu met het menselijk darmmicrobioom?

- 1: Helemaal niet vertrouwd
- 2: Beetje vertrouwd
- 3: Redelijk vertrouwd
- 4: Goed vertrouwd
- 5: Zeer vertrouwd

***Toelichting:*** *Gepaard met vraag 1.*

**Vraag 6 (Post)** · *Likert single answer, 5 punten (gelijk aan vraag 2)*

Microbiële diversiteit in de darm is belangrijk voor de menselijke gezondheid.

- 1: Helemaal mee oneens
- 2: Mee oneens
- 3: Neutraal
- 4: Mee eens
- 5: Helemaal mee eens

***Toelichting:*** *Gepaard met vraag 2.*

**Vraag 7 (Post)** · *Likert single answer, 5 punten*

Het Requiem voor een microbe heeft mij emotioneel geraakt.

- 1: Helemaal niet
- 2: Een beetje
- 3: Matig
- 4: Sterk
- 5: Zeer sterk

***Toelichting:*** *Toetst de affectieve werking van de centrale rouwhandeling.*

**Vraag 8 (Post)** · *Multiple choice, 1 antwoord, 5 opties*

Welke akte was voor u het meest memorabel?

- 1. Het ontstaan van het leven
- 2. Symbiose
- 3. De mens als holobiont
- 4. Het verbroken pact en Requiem voor een microbe
- 5. Rewilding en Feed Your Microbes

***Toelichting:*** *Triangulatie van zelfgerapporteerde memorability per akte.*

**Vraag 9 (Post)** · *Likert single answer, 5 punten*

Ik ben van plan om mij aan te melden voor het burgerwetenschapsproject Feed Your Microbes.

- 1: Zeer onwaarschijnlijk
- 2: Onwaarschijnlijk
- 3: Misschien
- 4: Waarschijnlijk
- 5: Zeer waarschijnlijk

***Toelichting:*** *Belangrijkste intentiemaat voor de gedragsverandering die de voorstelling beoogt.*

**Vraag 10 (Post)** · *Likert single answer, 5 punten*

Ik ben tot het inzicht gekomen dat verhoging van de vezelinname goed is voor de gezondheid.

- 1: Helemaal mee oneens
- 2: Mee oneens
- 3: Neutraal
- 4: Mee eens
- 5: Helemaal mee eens

***Toelichting:*** *Cognitieve maat voor de boodschap-uptake van de voorstelling. Bewust geformuleerd als inzicht (cognitief), niet als intentie (gedrag), om te voorkomen dat respondenten al vóór de start van de Feed Your Microbes-uitdaging hun voedingspatroon aanpassen. Daarmee blijft FYM het gecontroleerde gedragsstartpunt.*

**Vraag 11 (Post)** · *Text entry, single line, max 1 woord*

In één woord: wat neemt u vanavond mee uit de voorstelling?

***Toelichting:*** *Voor een live wordcloud tijdens de afsluiting (op de koepel) heeft Qualtrics geen native ondersteuning. Twee opties: ofwel post-hoc een wordcloud genereren uit de tekst-export (in R via wordcloud2 of via wordart.com), ofwel één losse Mentimeter-slide aanmaken uitsluitend voor deze laatste vraag, parallel aan de Qualtrics-survey, voor het theatrale slot. De Qualtrics-data blijven dan de basis voor de paper, en Mentimeter dient slechts als visualisatie.*

**Afsluitingsscherm, laatste pagina van de post-survey**

Hartelijk dank voor uw deelname. Uw antwoorden dragen bij aan een wetenschappelijk artikel over Symbiose en de communicatie van microbiële biodiversiteit.

Wilt u verder meedoen? Aanmelden voor Feed Your Microbes kan via de tweede QR-code op de koepel, of in de foyer na de voorstelling.

De burgerwetenschap is hier, vanavond, met u, begonnen.

## Privacy en ethiek

Geen persoonsgegevens worden verzameld. De viercijferige code is niet herleidbaar tot een individu. In het welkomstscherm is de doelstelling expliciet vermeld (gegevensverzameling voor wetenschappelijk artikel. Qualtrics-survey-instellingen op anonymous, geen IP-adres registreren, geen geolocatie.
